# Supplementary material
Source: PubMed Central journal article supplement (PMC6915823)
Supplement: kwx166suhwebmaterialfinal.pdf [file kwx166suhwebmaterialfinal.pdf]

## WEB MATERIAL

“Long-Term PM<sub>2.5</sub> Exposure and Respiratory, Cancer, and Cardiovascular Mortality  
in Older US Adults” by Pun et al.

### Contents

|                     |                                                                                                                                                                                                                                                                                                                          |
|---------------------|--------------------------------------------------------------------------------------------------------------------------------------------------------------------------------------------------------------------------------------------------------------------------------------------------------------------------|
| <b>Web Appendix</b> | Detailed methodology                                                                                                                                                                                                                                                                                                     |
| <b>Web Figure 1</b> | Boundaries of the 4 geographical regions used for the analysis, United States                                                                                                                                                                                                                                            |
| <b>Web Table 1</b>  | Total number of zip codes, Medicare enrollees, and deaths aged $\geq 65$ over 2000–2008, United States                                                                                                                                                                                                                   |
| <b>Web Figure 2</b> | Annual average PM <sub>2.5</sub> levels over 2000–2008, United States                                                                                                                                                                                                                                                    |
| <b>Web Table 2</b>  | Risk ratios (95% CI) for cause-specific mortality associated with increases in 12- to 60-month moving average PM <sub>2.5</sub> exposure, by region, 2000–2008, United States                                                                                                                                            |
| <b>Web Table 3</b>  | Sensitivity analyses using 3-, 6-, and 12-mile (4.8-, 9.6-, and 19.2-km) buffer zones to assess PM <sub>2.5</sub> exposures, 2000–2008, United States                                                                                                                                                                    |
| <b>Web Table 4</b>  | Temporal and spatiotemporal mortality risk ratios (95% CI) per 10- $\mu\text{g}/\text{m}^3$ increase in 12-month moving average PM <sub>2.5</sub> exposure: nationwide and by region, cause of death, base versus BRFSS-adjusted models for a subset of monitors with BRFSS data <sup>a</sup> , 2000–2008, United States |

## WEB APPENDIX

### Detailed Methodology

#### Details on the PM<sub>2.5</sub> data manipulation and imputation

We obtained daily PM<sub>2.5</sub> concentration data from EPA’s Air Quality System (AQS) from 2000 through 2008. Of the 988 AQS included monitors that had daily measurements for at least four calendar years, with each year having  $\geq 9$  months with  $\geq 4$  daily measurements, we adopted the imputation method used in Greven et al.(29), that accounts for seasonality in PM<sub>2.5</sub> levels and unevenly spaced measurements, to calculate the 12-month/60-month moving average of PM<sub>2.5</sub> for each month and location over the study period. Specifically, we filled small PM<sub>2.5</sub> data gaps by smoothing the time series at each location, using a linear regression with the daily pollutant values as the response, and thin plate regression splines of time with four degrees of freedom per year as the predictor. For gaps longer than 90 days, we smoothed the PM<sub>2.5</sub> time series before and after each gap separately. We considered the 12-month moving averages to be valid if there were  $\geq 350$  (out of 365) non-missing predicted daily values available for computation. For 60-month moving average, we considered valid measure if there were  $\geq 350$  (out of 365) non-missing predicted daily values available for 5 consecutive years.

#### Centering method

Since monthly PM<sub>2.5</sub> concentrations are generally higher at some monitors as compared to other monitors, we applied a centering method to remove monitor-specific influence on the monthly PM<sub>2.5</sub> concentrations. As our primary exposure measure, we used centered PM<sub>2.5</sub> exposures, which is the PM<sub>2.5</sub> concentration at site  $C$  corresponding to month  $t$  ( $PM_t^C$ ), centered by the average concentration at site  $C$  over the entire study period,  $\overline{PM}_C$ . This measure accounts for the fact that monthly PM<sub>2.5</sub> concentrations are generally higher at some sites as compared to other sites.

$$\text{Centered } PM_{2.5} = PM_t^C - \overline{PM}_C \quad [1]$$

#### Detailed regression analysis

$$\log E(Y_{at}^c) = \log(N_{at}^c) + \log(h^c(a)) + \beta PM_t^c \quad [2]$$

where  $Y_{at}^c$  is the number of deaths at age-month  $a$  in month  $t$  for monitor  $c$ ,  $N_{at}^c$  is the number of Medicare enrollees of age  $a$  with a zip code of residence matched to location  $c$  at the beginning of the month  $t$ , and  $\beta$  is the increase in the log-hazard of dying in a given month for a 1- $\mu\text{g}/\text{m}^3$  increase in average PM<sub>2.5</sub> concentration during the previous year.

#### Decomposition of PM<sub>2.5</sub> exposure measure into “temporal” and “spatiotemporal” components

We applied the method developed by Greven et al. (29) to decompose the PM<sub>2.5</sub> exposure into their “global” and “local” components, where:

- “*Temporal*”: represents the national temporal trends in monthly concentrations ( $\overline{PM}_t$ ) centered by the overall concentrations for all monitors and across the study period ( $\overline{PM}$ ):

$$\text{Temporal } PM_t = \overline{PM}_t - \overline{PM} \quad [3]$$

Given that this measure describes national temporal trend, the “global” measure directly reflects long-term time trends in exposure.

- “*Spatiotemporal*”: is equivalent to centered PM ( $PM_t^C - \overline{PM}_C$ ) minus its global component ( $\overline{PM}_t - \overline{PM}$ ):

$$\text{Spatiotemporal } PM_t^C = (PM_t^C - \overline{PM}_C) - (\overline{PM}_t - \overline{PM}) \quad [4]$$

where  $\overline{PM}_t$  represents the concentration mean for month  $t$  across all locations,  $\overline{PM}_C$  is the mean concentration for monitor  $C$ , and  $\overline{PM}$  the mean concentration across all monitors and years. In

essence, this measure captures the monthly  $PM_{2.5}$  concentration at monitor  $C$  that is not explained by year or monitor.

In the BRFSS-adjusted models, we parsed the BRFSS covariates into their “temporal” and “spatiotemporal” components, so that the risk ratios associated with “temporal” and “spatiotemporal”  $PM_{2.5}$  were estimated simultaneously adjusting for “temporal” and “spatiotemporal” BRFSS measures.

**Web Figure 1.** Boundaries of the 4 geographical regions used for the analysis, 2000–2008, United States

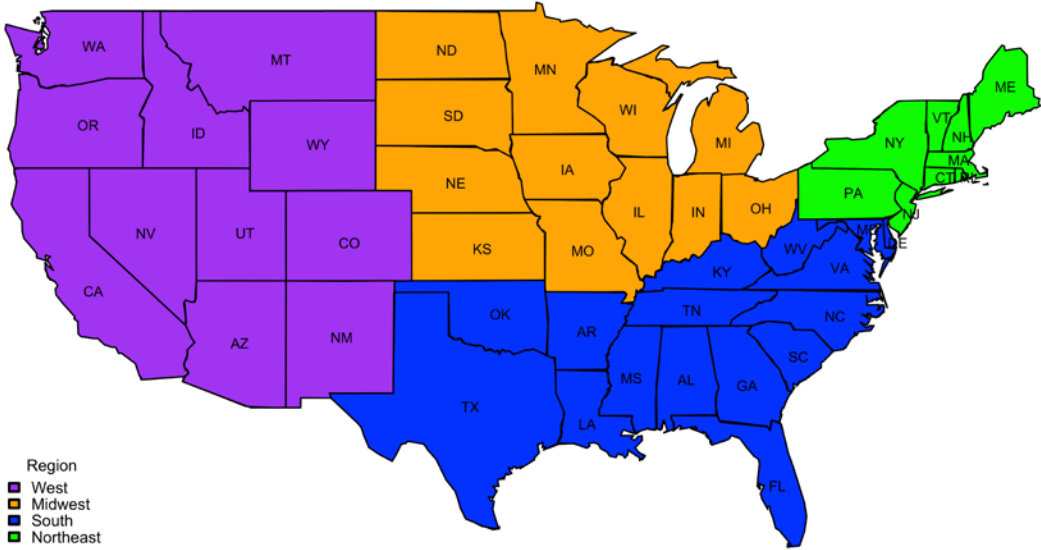

**Web Table 1.** Total numbers of zip codes, Medicare enrollees, and deaths among persons aged  $\geq 65$  years during 2000–2008, United States

| <b>Sample</b>                                                                                                                               | <b>No. (%) of Zip Codes</b> | <b>No. (%) of Enrollees</b> | <b>No. (%) of Deaths</b> |
|---------------------------------------------------------------------------------------------------------------------------------------------|-----------------------------|-----------------------------|--------------------------|
| Conterminous US, ages 65–120                                                                                                                | 46,130 (100)                | 52,925,449 (100)            | 15,849,593 (100)         |
| <b>Primary analysis:</b> zip codes with nearest monitor within a 6-mile (9.6-km) buffer zone and that had sufficient PM <sub>2.5</sub> data | 7,788 (17)                  | 18,937,461 (36)             | 4,235,282 (27)           |
| <b>Sensitivity analysis:</b> zip codes with SMART BRFSS data available                                                                      | 5,169 (11)                  | 12,188,746 (23)             | 2,097,508 (13)           |

**Web Figure 2.** Annual average PM<sub>2.5</sub> levels over 2000–2008, United States

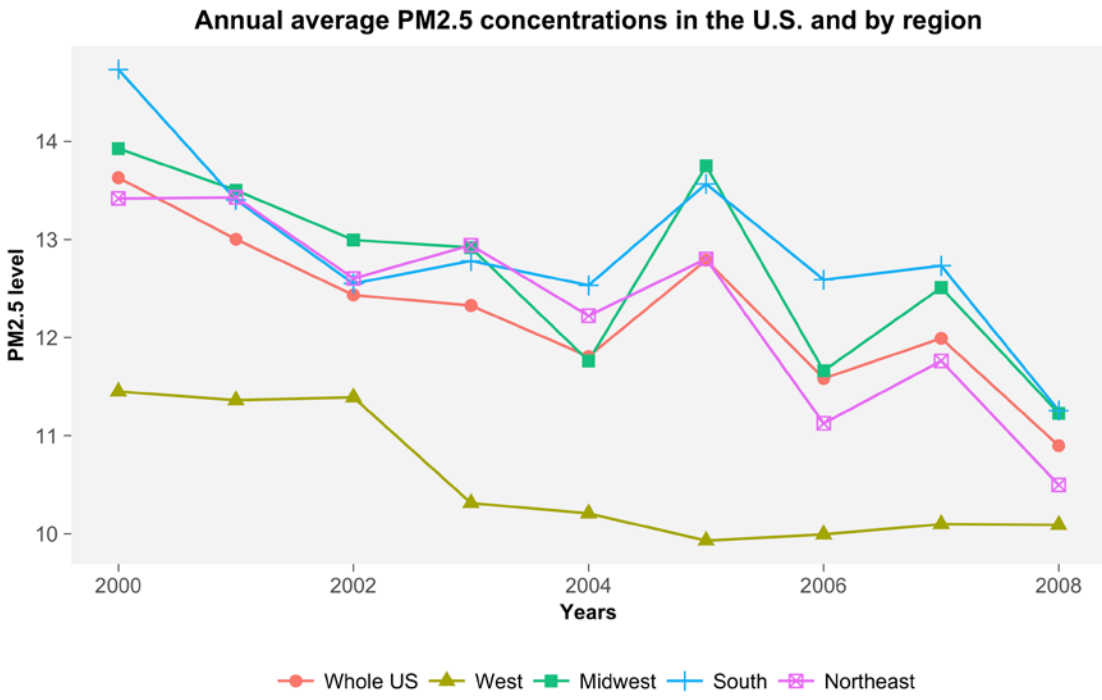

**Web Table 2.** Risk ratios (95% CI) for cause-specific mortality associated with increases in 12- to 60-month moving average PM<sub>2.5</sub> exposure, by region, based on 988 monitors, 2000–2008, United States

| Cause of Death<br>by Region | Moving Average for PM <sub>2.5</sub> |                     |                     |                     |                     |
|-----------------------------|--------------------------------------|---------------------|---------------------|---------------------|---------------------|
|                             | 12-Month                             | 24-Month            | 36-Month            | 48-Month            | 60-Month            |
| <b>All causes</b>           |                                      |                     |                     |                     |                     |
| United States               | 1.227 (1.222-1.232)                  | 1.311 (1.304-1.318) | 1.374 (1.365-1.384) | 1.426 (1.412-1.439) | 1.459 (1.439-1.48)  |
| West                        | 1.168 (1.161-1.174)                  | 1.22 (1.212-1.228)  | 1.249 (1.239-1.26)  | 1.274 (1.26-1.289)  | 1.305 (1.283-1.328) |
| Midwest                     | 1.239 (1.228-1.249)                  | 1.435 (1.415-1.455) | 1.561 (1.531-1.59)  | 1.729 (1.682-1.777) | 1.55 (1.496-1.605)  |
| South                       | 1.256 (1.244-1.268)                  | 1.35 (1.329-1.371)  | 1.5 (1.464-1.536)   | 1.75 (1.69-1.813)   | 1.729 (1.65-1.812)  |
| Northeast                   | 1.434 (1.418-1.45)                   | 1.674 (1.647-1.701) | 1.973 (1.93-2.017)  | 2.191 (2.124-2.26)  | 2.313 (2.215-2.415) |
| <b>Nonaccidental</b>        |                                      |                     |                     |                     |                     |
| United States               | 1.232 (1.227-1.237)                  | 1.318 (1.31-1.325)  | 1.382 (1.372-1.392) | 1.434 (1.42-1.448)  | 1.469 (1.448-1.489) |
| West                        | 1.171 (1.165-1.178)                  | 1.223 (1.214-1.231) | 1.252 (1.241-1.263) | 1.277 (1.262-1.292) | 1.31 (1.287-1.333)  |
| Midwest                     | 1.243 (1.233-1.254)                  | 1.448 (1.427-1.468) | 1.584 (1.554-1.614) | 1.759 (1.711-1.809) | 1.567 (1.513-1.624) |
| South                       | 1.263 (1.251-1.276)                  | 1.362 (1.341-1.384) | 1.513 (1.477-1.55)  | 1.777 (1.714-1.841) | 1.748 (1.667-1.833) |
| Northeast                   | 1.444 (1.428-1.46)                   | 1.694 (1.666-1.722) | 2.001 (1.957-2.046) | 2.218 (2.15-2.289)  | 2.353 (2.252-2.458) |
| <b>Accidental</b>           |                                      |                     |                     |                     |                     |
| United States               | 1.008 (0.98-1.036)                   | 1.014 (0.975-1.055) | 1.022 (0.97-1.076)  | 1.055 (0.984-1.132) | 1.046 (0.946-1.158) |
| West                        | 0.999 (0.959-1.041)                  | 1.079 (1.024-1.137) | 1.097 (1.027-1.172) | 1.115 (1.022-1.216) | 1.081 (0.948-1.232) |
| Midwest                     | 1.047 (0.988-1.109)                  | 0.966 (0.879-1.062) | 0.809 (0.713-0.919) | 0.815 (0.679-0.979) | 0.936 (0.74-1.185)  |
| South                       | 0.988 (0.928-1.051)                  | 0.927 (0.838-1.026) | 1.037 (0.89-1.209)  | 0.968 (0.772-1.213) | 1.124 (0.832-1.519) |
| Northeast                   | 1.002 (0.925-1.086)                  | 0.906 (0.806-1.019) | 0.962 (0.821-1.127) | 1.171 (0.937-1.463) | 0.978 (0.718-1.333) |
| <b>CVD</b>                  |                                      |                     |                     |                     |                     |
| United States               | 1.559 (1.549-1.568)                  | 1.788 (1.774-1.803) | 1.888 (1.867-1.909) | 1.99 (1.96-2.019)   | 2.106 (2.061-2.153) |
| West                        | 1.408 (1.397-1.42)                   | 1.517 (1.501-1.533) | 1.555 (1.534-1.576) | 1.591 (1.563-1.619) | 1.651 (1.607-1.696) |
| Midwest                     | 1.57 (1.549-1.591)                   | 2.226 (2.177-2.276) | 2.477 (2.403-2.552) | 3.079 (2.947-3.217) | 2.667 (2.52-2.823)  |
| South                       | 1.754 (1.727-1.782)                  | 2.18 (2.126-2.236)  | 2.757 (2.652-2.865) | 3.961 (3.741-4.195) | 4.506 (4.171-4.867) |
| Northeast                   | 2.055 (2.02-2.091)                   | 2.876 (2.805-2.95)  | 3.591 (3.47-3.717)  | 4.007 (3.815-4.207) | 4.04 (3.771-4.328)  |
| <b>IHD</b>                  |                                      |                     |                     |                     |                     |
| United States               | 1.753 (1.739-1.767)                  | 2.036 (2.014-2.059) | 2.123 (2.092-2.154) | 2.204 (2.161-2.249) | 2.407 (2.337-2.479) |
| West                        | 1.544 (1.528-1.561)                  | 1.655 (1.632-1.678) | 1.669 (1.64-1.699)  | 1.705 (1.666-1.744) | 1.822 (1.758-1.888) |
| Midwest                     | 1.768 (1.735-1.801)                  | 2.659 (2.579-2.743) | 2.962 (2.841-3.089) | 3.62 (3.405-3.849)  | 3.09 (2.855-3.343)  |

|                        |                     |                     |                     |                      |                       |
|------------------------|---------------------|---------------------|---------------------|----------------------|-----------------------|
| South                  | 2.138 (2.091-2.186) | 2.894 (2.791-3.001) | 3.929 (3.717-4.152) | 5.797 (5.342-6.292)  | 6.474 (5.798-7.229)   |
| Northeast              | 2.404 (2.35-2.458)  | 3.66 (3.541-3.783)  | 4.625 (4.422-4.838) | 5.092 (4.775-5.43)   | 5.457 (4.981-5.979)   |
| <b>CBVD</b>            |                     |                     |                     |                      |                       |
| United States          | 1.778 (1.753-1.804) | 2.175 (2.131-2.219) | 2.35 (2.288-2.413)  | 2.515 (2.425-2.609)  | 2.353 (2.229-2.484)   |
| West                   | 1.698 (1.665-1.731) | 1.906 (1.859-1.955) | 2.034 (1.97-2.1)    | 2.138 (2.048-2.231)  | 1.993 (1.865-2.129)   |
| Midwest                | 1.685 (1.631-1.741) | 2.718 (2.576-2.868) | 2.931 (2.725-3.153) | 3.509 (3.152-3.907)  | 2.514 (2.186-2.892)   |
| South                  | 1.888 (1.822-1.956) | 2.456 (2.316-2.604) | 3.069 (2.804-3.36)  | 4.769 (4.168-5.456)  | 4.734 (3.944-5.682)   |
| Northeast              | 2.287 (2.186-2.393) | 3.311 (3.097-3.541) | 4.075 (3.717-4.468) | 3.809 (3.341-4.342)  | 3.693 (3.075-4.436)   |
| <b>CHF</b>             |                     |                     |                     |                      |                       |
| United States          | 1.073 (1.048-1.099) | 1.098 (1.062-1.136) | 1.246 (1.192-1.302) | 1.425 (1.343-1.512)  | 1.794 (1.648-1.954)   |
| West                   | 0.773 (0.745-0.802) | 0.788 (0.752-0.825) | 0.903 (0.853-0.956) | 0.976 (0.907-1.05)   | 1.143 (1.025-1.275)   |
| Midwest                | 1.379 (1.314-1.446) | 1.811 (1.676-1.958) | 2.297 (2.07-2.548)  | 3.075 (2.645-3.574)  | 3.794 (3.119-4.616)   |
| South                  | 1.207 (1.141-1.276) | 1.148 (1.047-1.26)  | 1.027 (0.89-1.184)  | 1.599 (1.296-1.972)  | 1.955 (1.471-2.599)   |
| Northeast              | 1.646 (1.542-1.758) | 2.085 (1.894-2.295) | 3.08 (2.703-3.511)  | 4.628 (3.849-5.565)  | 5.411 (4.196-6.977)   |
| <b>All respiratory</b> |                     |                     |                     |                      |                       |
| United States          | 1.238 (1.224-1.252) | 1.327 (1.306-1.349) | 1.463 (1.433-1.494) | 1.584 (1.54-1.63)    | 1.624 (1.558-1.693)   |
| West                   | 1.21 (1.191-1.229)  | 1.302 (1.277-1.329) | 1.369 (1.335-1.404) | 1.428 (1.381-1.476)  | 1.437 (1.366-1.512)   |
| Midwest                | 1.167 (1.137-1.198) | 1.152 (1.103-1.202) | 1.421 (1.341-1.505) | 1.529 (1.406-1.663)  | 1.32 (1.185-1.47)     |
| South                  | 1.238 (1.202-1.275) | 1.325 (1.263-1.389) | 1.48 (1.377-1.592)  | 2 (1.797-2.227)      | 2.082 (1.804-2.403)   |
| Northeast              | 1.519 (1.468-1.571) | 1.811 (1.723-1.904) | 2.44 (2.279-2.611)  | 3.264 (2.966-3.592)  | 4.231 (3.7-4.837)     |
| <b>COPD</b>            |                     |                     |                     |                      |                       |
| United States          | 1.098 (1.081-1.116) | 1.112 (1.088-1.137) | 1.191 (1.157-1.227) | 1.163 (1.118-1.209)  | 1.067 (1.007-1.13)    |
| West                   | 1.12 (1.096-1.145)  | 1.178 (1.146-1.211) | 1.225 (1.183-1.269) | 1.228 (1.173-1.285)  | 1.177 (1.098-1.263)   |
| Midwest                | 1.037 (1-1.075)     | 0.918 (0.866-0.974) | 1.042 (0.962-1.128) | 0.856 (0.762-0.961)  | 0.655 (0.565-0.758)   |
| South                  | 1.022 (0.982-1.065) | 0.99 (0.927-1.058)  | 0.969 (0.877-1.071) | 0.817 (0.704-0.947)  | 0.909 (0.746-1.106)   |
| Northeast              | 1.238 (1.176-1.302) | 1.157 (1.073-1.248) | 1.452 (1.31-1.608)  | 1.523 (1.319-1.758)  | 1.386 (1.136-1.693)   |
| <b>Pneumonia</b>       |                     |                     |                     |                      |                       |
| United States          | 1.60 (1.567-1.633)  | 1.911 (1.858-1.965) | 2.197 (2.119-2.278) | 2.573 (2.45-2.702)   | 3.157 (2.934-3.397)   |
| West                   | 1.474 (1.435-1.513) | 1.667 (1.612-1.723) | 1.813 (1.738-1.891) | 1.944 (1.839-2.055)  | 2.147 (1.97-2.339)    |
| Midwest                | 1.629 (1.545-1.717) | 2.055 (1.884-2.241) | 2.878 (2.56-3.234)  | 4.334 (3.658-5.134)  | 4.639 (3.717-5.789)   |
| South                  | 1.879 (1.772-1.993) | 2.868 (2.606-3.157) | 3.82 (3.298-4.425)  | 10.17 (8.183-12.638) | 13.275 (9.884-17.829) |
| Northeast              | 1.993 (1.878-2.115) | 3.174 (2.912-3.459) | 5.162 (4.591-5.805) | 8.578 (7.256-10.14)  | 15.114 (11.922-19.16) |



---

| <b>All cancer</b>  |                     |                     |                     |                     |                     |
|--------------------|---------------------|---------------------|---------------------|---------------------|---------------------|
| United States      | 1.145 (1.136-1.155) | 1.192 (1.178-1.206) | 1.208 (1.189-1.226) | 1.23 (1.205-1.256)  | 1.238 (1.201-1.276) |
| West               | 1.12 (1.107-1.134)  | 1.137 (1.12-1.154)  | 1.149 (1.127-1.171) | 1.147 (1.119-1.176) | 1.142 (1.1-1.186)   |
| Midwest            | 1.113 (1.093-1.133) | 1.238 (1.201-1.275) | 1.289 (1.239-1.342) | 1.383 (1.305-1.466) | 1.339 (1.243-1.443) |
| South              | 1.169 (1.146-1.194) | 1.222 (1.181-1.263) | 1.224 (1.164-1.288) | 1.41 (1.308-1.519)  | 1.398 (1.266-1.544) |
| Northeast          | 1.271 (1.242-1.301) | 1.406 (1.358-1.455) | 1.475 (1.408-1.546) | 1.554 (1.456-1.659) | 1.596 (1.457-1.748) |
| <b>Lung cancer</b> |                     |                     |                     |                     |                     |
| United States      | 1.132 (1.114-1.15)  | 1.217 (1.19-1.245)  | 1.253 (1.216-1.292) | 1.268 (1.217-1.321) | 1.33 (1.253-1.411)  |
| West               | 1.185 (1.157-1.213) | 1.219 (1.183-1.257) | 1.246 (1.2-1.295)   | 1.204 (1.145-1.266) | 1.255 (1.163-1.355) |
| Midwest            | 1.028 (0.993-1.063) | 1.097 (1.037-1.16)  | 1.155 (1.072-1.244) | 1.185 (1.062-1.321) | 1.161 (1.01-1.334)  |
| South              | 1.096 (1.056-1.139) | 1.215 (1.143-1.292) | 1.18 (1.076-1.295)  | 1.497 (1.306-1.716) | 1.573 (1.311-1.886) |
| Northeast          | 1.191 (1.138-1.246) | 1.404 (1.314-1.502) | 1.551 (1.416-1.699) | 1.692 (1.487-1.925) | 1.949 (1.628-2.332) |

---

CBVD, cerebrovascular disease; CHF, congestive heart failure; CI, confidence interval; COPD, chronic obstructive pulmonary disease; CVD, cardiovascular disease; IHD, ischemic heart disease.

**Web Table 3.** Sensitivity analyses using 3-, 6-, and 12-mile (4.8-, 9.6-, and 19.2-km) buffer zones to assess PM<sub>2.5</sub> exposures, 2000–2008, United States

| Region        | Risk Ratio per 10- $\mu\text{g}/\text{m}^3$ Change in PM <sub>2.5</sub> |                     |                     |
|---------------|-------------------------------------------------------------------------|---------------------|---------------------|
|               | 3-Mile (4.8-km)                                                         | 6-Mile (9.6-km)     | 12-Mile (19.2-km)   |
| United States | 1.218 (1.211-1.225)                                                     | 1.232 (1.227-1.237) | 1.251 (1.246-1.255) |
| West          | 1.142 (1.133-1.152)                                                     | 1.167 (1.161-1.174) | 1.18 (1.174-1.186)  |
| Midwest       | 1.241 (1.226-1.256)                                                     | 1.252 (1.241-1.263) | 1.272 (1.262-1.281) |
| South         | 1.269 (1.251-1.287)                                                     | 1.268 (1.256-1.281) | 1.3 (1.289-1.311)   |
| Northeast     | 1.388 (1.368-1.409)                                                     | 1.44 (1.424-1.457)  | 1.429 (1.415-1.442) |

**Web Table 4.** Temporal and spatiotemporal mortality risk ratios (95% CI) per 10- $\mu\text{g}/\text{m}^3$  increase in 12-month moving average  $\text{PM}_{2.5}$  exposure: nationwide and by region, cause of death, nonadjusted versus BRFSS-adjusted models for a subset of monitors with BRFSS data<sup>a</sup>, 2000–2008, United States

| Cause of Death and Region       | Nonadjusted Model    |                      | BRFSS-Adjusted Model |                      |
|---------------------------------|----------------------|----------------------|----------------------|----------------------|
|                                 | Temporal             | Spatiotemporal       | Temporal             | Spatiotemporal       |
| <b>All causes</b>               |                      |                      |                      |                      |
| United States                   | 2.051 (1.996, 2.107) | 1.03 (1.015, 1.046)  | 1.328 (1.27, 1.389)  | 1.003 (0.988, 1.019) |
| West                            | 1.385 (1.315, 1.459) | 1.127 (1.104, 1.15)  | 1.742 (1.607, 1.888) | 1.046 (1.023, 1.071) |
| Midwest                         | 1.356 (1.296, 1.418) | 1.109 (1.066, 1.153) | 1.178 (1.124, 1.236) | 0.982 (0.942, 1.023) |
| South                           | 1.611 (1.531, 1.694) | 0.978 (0.935, 1.024) | 1.314 (1.225, 1.408) | 0.966 (0.922, 1.012) |
| Northeast                       | 1.799 (1.732, 1.868) | 0.989 (0.942, 1.038) | 1.128 (1.06, 1.2)    | 1.037 (0.987, 1.09)  |
| <b>Accidental</b>               |                      |                      |                      |                      |
| United States                   | 0.911 (0.675, 1.23)  | 1.223 (1.098, 1.362) | 0.871 (0.727, 1.044) | 1.217 (1.093, 1.355) |
| West                            | 1.233 (0.732, 2.076) | 1.325 (1.126, 1.559) | 0.773 (0.565, 1.058) | 1.279 (1.101, 1.485) |
| Midwest                         | 0.914 (0.667, 1.253) | 1.2 (0.927, 1.554)   | 0.922 (0.685, 1.241) | 1.121 (0.872, 1.441) |
| South                           | 1.164 (0.742, 1.826) | 1.067 (0.788, 1.444) | 1.183 (0.852, 1.642) | 1.102 (0.818, 1.484) |
| Northeast                       | 0.839 (0.538, 1.309) | 1.052 (0.737, 1.501) | 1.06 (0.808, 1.389)  | 1.072 (0.757, 1.519) |
| <b>All cardiovascular</b>       |                      |                      |                      |                      |
| United States                   | 4.38 (4.194, 4.574)  | 1.066 (1.041, 1.092) | 1.584 (1.476, 1.701) | 0.992 (0.968, 1.016) |
| West                            | 2.675 (2.456, 2.914) | 1.233 (1.195, 1.272) | 2.968 (2.611, 3.374) | 1.092 (1.055, 1.132) |
| Midwest                         | 1.589 (1.478, 1.709) | 1.346 (1.264, 1.433) | 1.236 (1.144, 1.334) | 0.998 (0.933, 1.067) |
| South                           | 3.082 (2.837, 3.348) | 0.984 (0.914, 1.06)  | 1.613 (1.441, 1.807) | 0.961 (0.891, 1.036) |
| Northeast                       | 2.988 (2.817, 3.171) | 0.868 (0.803, 0.937) | 1.379 (1.251, 1.52)  | 0.916 (0.847, 0.991) |
| <b>Ischemic heart disease</b>   |                      |                      |                      |                      |
| United States                   | 6.096 (5.743, 6.47)  | 1.088 (1.054, 1.123) | 1.876 (1.703, 2.067) | 0.987 (0.955, 1.019) |
| West                            | 2.922 (2.587, 3.301) | 1.316 (1.263, 1.371) | 3.326 (2.782, 3.977) | 1.167 (1.113, 1.224) |
| Midwest                         | 1.707 (1.54, 1.892)  | 1.47 (1.346, 1.606)  | 1.305 (1.17, 1.455)  | 1.018 (0.926, 1.119) |
| South                           | 4.444 (3.949, 5.002) | 0.944 (0.849, 1.049) | 2.023 (1.724, 2.374) | 0.897 (0.805, 0.999) |
| Northeast                       | 3.813 (3.531, 4.118) | 0.788 (0.711, 0.874) | 1.597 (1.408, 1.812) | 0.831 (0.748, 0.924) |
| <b>Cerebrovascular disease</b>  |                      |                      |                      |                      |
| United States                   | 5.725 (5.147, 6.368) | 1.196 (1.129, 1.266) | 1.52 (1.276, 1.811)  | 1.093 (1.032, 1.158) |
| West                            | 5.038 (4.138, 6.134) | 1.335 (1.238, 1.438) | 4.359 (3.242, 5.862) | 1.113 (1.024, 1.209) |
| Midwest                         | 1.713 (1.443, 2.034) | 1.553 (1.335, 1.806) | 1.27 (1.059, 1.524)  | 1.1 (0.938, 1.291)   |
| South                           | 3.375 (2.781, 4.097) | 1.157 (0.973, 1.375) | 1.425 (1.095, 1.854) | 1.122 (0.941, 1.336) |
| Northeast                       | 3.384 (2.881, 3.976) | 1.044 (0.856, 1.273) | 1.315 (1.009, 1.713) | 1.109 (0.906, 1.359) |
| <b>Congestive heart failure</b> |                      |                      |                      |                      |
| United States                   | 2.64 (2.245, 3.104)  | 0.864 (0.785, 0.952) | 1.441 (1.104, 1.881) | 0.85 (0.771, 0.936)  |
| West                            | 1.41 (1.024, 1.943)  | 0.76 (0.661, 0.872)  | 1.691 (1.024, 2.793) | 0.734 (0.631, 0.854) |
| Midwest                         | 1.885 (1.465, 2.424) | 1.076 (0.86, 1.347)  | 1.503 (1.151, 1.962) | 0.859 (0.677, 1.091) |
| South                           | 1.866 (1.368, 2.547) | 1.165 (0.893, 1.521) | 1.655 (1.08, 2.535)  | 1.148 (0.877, 1.503) |
| Northeast                       | 2.361 (1.88, 2.966)  | 0.908 (0.686, 1.203) | 1.21 (0.83, 1.763)   | 1.002 (0.752, 1.334) |
| <b>All respiratory</b>          |                      |                      |                      |                      |
| United States                   | 2.462 (2.265, 2.676) | 1.021 (0.975, 1.069) | 1.474 (1.287, 1.688) | 0.988 (0.944, 1.035) |
| West                            | 1.379 (1.183, 1.607) | 1.164 (1.096, 1.236) | 2.388 (1.886, 3.023) | 1.027 (0.96, 1.099)  |
| Midwest                         | 1.61 (1.402, 1.848)  | 1.018 (0.902, 1.149) | 1.389 (1.2, 1.607)   | 0.867 (0.763, 0.985) |
| South                           | 1.68 (1.435, 1.966)  | 0.926 (0.803, 1.068) | 1.28 (1.031, 1.588)  | 0.911 (0.789, 1.052) |
| Northeast                       | 2.212 (1.966, 2.489) | 0.946 (0.815, 1.099) | 1.34 (1.103, 1.628)  | 1.031 (0.885, 1.201) |

**COPD**

|               |                      |                      |                      |                      |
|---------------|----------------------|----------------------|----------------------|----------------------|
| United States | 1.535 (1.366, 1.726) | 1.072 (1.005, 1.145) | 1.346 (1.112, 1.629) | 1.052 (0.985, 1.123) |
| West          | 1.084 (0.882, 1.331) | 1.158 (1.064, 1.261) | 1.76 (1.278, 2.424)  | 1.025 (0.933, 1.126) |
| Midwest       | 1.472 (1.217, 1.781) | 1.098 (0.929, 1.297) | 1.429 (1.168, 1.748) | 1.031 (0.866, 1.228) |
| South         | 1.136 (0.915, 1.41)  | 0.853 (0.701, 1.038) | 1.293 (0.96, 1.741)  | 0.85 (0.697, 1.036)  |
| Northeast     | 1.574 (1.319, 1.879) | 1.026 (0.821, 1.283) | 1.177 (0.88, 1.574)  | 1.049 (0.835, 1.317) |

**Pneumonia**

|               |                      |                      |                      |                      |
|---------------|----------------------|----------------------|----------------------|----------------------|
| United States | 6.59 (5.622, 7.723)  | 0.976 (0.901, 1.056) | 1.971 (1.526, 2.545) | 0.886 (0.817, 0.961) |
| West          | 2.73 (2.004, 3.719)  | 1.181 (1.068, 1.305) | 5.695 (3.654, 8.876) | 0.97 (0.863, 1.09)   |
| Midwest       | 2.499 (1.892, 3.301) | 1.069 (0.836, 1.367) | 1.797 (1.338, 2.414) | 0.682 (0.525, 0.886) |
| South         | 4.049 (2.937, 5.582) | 0.982 (0.735, 1.31)  | 1.485 (0.956, 2.307) | 0.945 (0.705, 1.266) |
| Northeast     | 3.408 (2.776, 4.184) | 0.729 (0.555, 0.956) | 1.746 (1.243, 2.453) | 0.85 (0.645, 1.12)   |

**All cancer**

|               |                      |                      |                      |                      |
|---------------|----------------------|----------------------|----------------------|----------------------|
| United States | 1.492 (1.409, 1.58)  | 1.015 (0.982, 1.048) | 1.167 (1.062, 1.282) | 0.997 (0.965, 1.031) |
| West          | 1.307 (1.167, 1.463) | 1.029 (0.985, 1.076) | 1.29 (1.084, 1.535)  | 1.00 (0.952, 1.051)  |
| Midwest       | 1.131 (1.029, 1.243) | 1.055 (0.972, 1.145) | 1.07 (0.968, 1.183)  | 1.014 (0.931, 1.105) |
| South         | 1.369 (1.23, 1.523)  | 0.961 (0.872, 1.059) | 1.149 (0.992, 1.331) | 0.952 (0.863, 1.05)  |
| Northeast     | 1.41 (1.303, 1.526)  | 1.217 (1.099, 1.348) | 1.119 (0.983, 1.274) | 1.238 (1.115, 1.374) |

**Lung cancer**

|               |                      |                      |                      |                      |
|---------------|----------------------|----------------------|----------------------|----------------------|
| United States | 1.566 (1.403, 1.748) | 1.024 (0.96, 1.093)  | 1.341 (1.118, 1.608) | 1.007 (0.943, 1.075) |
| West          | 1.354 (1.083, 1.692) | 1.096 (1.002, 1.199) | 1.49 (1.054, 2.107)  | 1.118 (1.012, 1.235) |
| Midwest       | 1.123 (0.938, 1.345) | 0.975 (0.833, 1.142) | 1.109 (0.917, 1.342) | 0.966 (0.818, 1.14)  |
| South         | 1.788 (1.465, 2.182) | 0.89 (0.744, 1.064)  | 1.45 (1.104, 1.903)  | 0.874 (0.729, 1.047) |
| Northeast     | 1.356 (1.161, 1.584) | 1.228 (1.006, 1.498) | 1.055 (0.817, 1.363) | 1.249 (1.019, 1.53)  |

---

BRFSS, Behavioral Risk Factor Surveillance System; COPD, chronic obstructive pulmonary disease.

<sup>a</sup> BRFSS-adjusted model: adjusting for county-level race (being nonwhite), smoking, diabetes, body mass index, alcohol consumption (>2 drinks/day), asthma, and median income.
